# Supplementary material for: Subsurface floats in the Filchner Trough provide first direct under-ice tracks of eddies and circulation on shelf
Source: Copernicus journal article supplement (doi:10.5194/egusphere-2023-2952), 2023-12-11
Supplement: Supplementary file [file egusphere-2023-2952-AC2-supplement.pdf]

**Reviewer 2 : please find below our point-by-point response to reviewer #2. We copied reviewer comments in black. Our response is in orange. Citations from the manuscript are indicated in orange italicised text, and line numbers correspond to line numbers in the new version of the manuscript.**

I find this paper to be an important contribution and enthusiastically recommend its publication. I do however recommend some minor revisions, and have three main comments for the authors. Firstly, I think the importance of this work is considerably under-sold, and think that it would be more impactful if the authors were more clear about what was novel. Secondly, I recommend moving the float processing to an appendix. Thirdly, I'm not at all convinced by the underdeveloped treatment of eddies and recommending cutting this part of the paper. Finally I have a number of minor presentational comments that should be easy to address.

We thank the reviewer for their careful reading of the manuscript and for providing such an enthusiastic comment on our work. We have considered all the comments made by the reviewer, as detailed in our responses below.

## **1 – Clarifying the novel results**

It's important to be clear about what exactly is new. In the abstract, we are told "the mWDW flowing onto the continental shelf follows two pathways" and that these are the first under-ice Lagrangian measurements in the region. Later, we are told "there are two pathways for WDW to enter the continental shelf", citing earlier studies. It is essential to clarify how these facts are related. For example, if you could say "we provide the first in situ confirmation of two WDW pathways that have been indirectly inferred by earlier studies", that would add a lot of heft to the results. For this reason, when the two pathways are introduced beginning on line 53, it is important to give more details: are these known or directly measured? How were they inferred? What types of measurements were used? Etc. Otherwise, as it is presented, it looks like you could say "As everybody knows" in the abstract, which I'm sure is not the case.

Accepted.

*Abstract: "We provide the first Lagrangian in situ confirmation that the mWDW flowing onto the continental shelf follows two pathways: the eastern flank of the Filchner Trough and via a Small Trough on the shallow shelf farther east."*

*Line 53: "Conductivity-temperature-depth (CTD) sections and mooring time-series have been only sporadically obtained in the area. These observations have suggested that there are two main pathways for WDW to enter the continental shelf and subsequently flow southward toward the ice shelf as a yet cooler and fresher version of the WDW, referred to as modified WDW (mWDW): an eastern pathway, along the eastern flank of the Filchner Trough, and a western pathway, in the Central Trough west of the Berkner Bank (Fig. 1; Nicholls et al., 2009, 2008; Ryan et al., 2017). The western pathway is associated with the largest heat content (Nicholls et al., 2008), and about half of the heat at the shelf break that actually reaches the FRIS edge (Davis et al., 2022). CTD observations have also indirectly suggested that mWDW could enter the continental shelf by a third pathway flowing through the "Small Trough" (see Figure 1) directly east of the Filchner Trough, but this pathway has never been directly measured."*

Several other results encountered in the paper strike me as potentially novel, and if so, worth emphasizing: (i) first direct measurements of transit times for outflowing ISW and inflowing WDW; (ii) clear documentation of a sharp transition between southward and northward flow along the eastern flank of the Filchner Trough at 400–500 m (can you be more specific?); (iii) direct observations of a pool of an apparently stagnant pool of ISW, associated with high EKE region and long residence times, in the deeper part of the trough offshore of the transition isobath. All of these fact are mentioned, but they add up to a clearer picture of the behavior of the overall region than comes through because they are mentioned in isolation and are not adequately discussed within the context of what is already known. I would recommend to the authors to decide what the novel results are, and then make these crystal clear by itemizing them from the start, and returning to them in turn in dedicated paragraphs or perhaps even subsections where the direct and indirect evidence is all laid out.

Accepted. We clarified that aspect in the last paragraph of the introduction.

*Line 94: “Our observations on the eastern Weddell Sea shelf allow us to describe the circulation in the Filchner Trough region and the water mass pathways based on the float trajectories and the hydrography profiles, some of which are taken in previously unexplored areas that are typically covered with sea ice. We are able to examine the Lagrangian pathways of the mWDW toward the ice shelf, its interaction with the ISW, and the residence time of the ISW within the Filchner Trough. Selected mooring observations and ship-based measurements from the same time period complementing the float data are presented. This combined dataset allow us to present the first direct measurements of pathway and transit times for outflowing ISW and inflowing mWDW. In particular, we demonstrate the existence of a mWDW pathway through a small trough which was previously suggested, but was never directly measured. We also present the first direct observations of a pool of ISW with very long residence times of several years in the deeper part of the Filchner Trough.”*

A final factor I think the authors could emphasize further is the possibility of a regime transition if the ISW did not block the inflowing WDW. The hypothesis that the presence of ISW blocks WDW and therefore modulates the heat delivered to the ice sheet is enticingly suggesting by these results. Fleshing out this hypothesis with a description of “what-if” simulations or additional observations that could be carried out would be a powerful way to conclude the paper.

## **2 – Float positioning**

The gory details of float positioning should in my opinion be relegated to an appendix, as similar procedures have been followed in many previous studies. Although it is of course an essential part of the work, only a small percentage of readers would likely be interested. It would however be helpful to cite any papers (other than Rossby’s original) that the authors are patterning their processing off of, e.g. Girton et al (2019), and also mention which if any aspects the processing are innovative or different. Finally the details of the loess filter should be mentioned because this is not a single filter but a family controlled by multiple parameters.

Given the importance of this procedure for the paper, we prefer keeping this section in the main core of the paper. However, we can reconsider this decision if the editor thinks the section should sit in Appendix. The second reason we want to keep in the core of the paper, is that we found that these kinds of procedures are poorly documented in past

papers, often relegated to hard-to-obtain reports. Hence we wish to provide details on our processing, as well as for clarity of purpose. We provided details for the loess method, as requested.

Out of curiosity, how did you deploy these floats? It seems relevant to mention whether and how they were deployed under ice.

These floats were deployed in summer in open waters, before the seasonal advance of sea-ice. We have clarified that point:

Line 108: *“The floats were deployed in open waters, before the seasonal advance of sea-ice.”*

### **3 – Don’t talk about eddies**

The authors mention eddies and eddy generation in the title and abstract, but this is only discussed very briefly around lines 250–255 and again around line 340, together with Appendix A and Table 1. This is neither central to the authors’ results nor well-developed. I would recommend to cut all of this. There are rigorous methods to exact eddies from Lagrangian data, but the bivariate EMD is not one of them. While this method does split a Lagrangian time series into pieces, the relationship of those pieces to the signals generated by eddies has never been examined, and might be nonsense. Furthermore, looking for isolated loops is a terrible way to identify eddies, despite the fact that it is often used. All the authors need to do to make their point is to look at the bandpassed or lowpassed velocity variance, and say that this is higher within the ISW-dominated deeper part of the Filchner Trough and that this higher variance, which will undoubtedly be isotropic, likely indicates enhanced eddy activity. This will be sufficient for the paper without over-reaching. A detailed survey of eddies would be deserving of its own paper.

Accepted:

- We removed the Appendix entirely.
- We removed the description of eddies in the result section; only left the few descriptions of eddy motion in the trajectories.
- We changed the associated paragraph in the discussion to something much more speculative:

Line 255: *“The strong horizontal shear on the eastern side of the Filchner Trough, inferred from the opposing float directions over the eastern flank of the Filchner Trough, is likely associated with instabilities and the resulting mixing of water masses. Unfortunately, the set of Lagrangian trajectories does not provide enough spatial and temporal sampling to address mixing or instability questions fully here. The trajectories of the floats show however some eddy motion at along the eastern flank of the Filchner Trough, which might be an indication of instabilities and eddy activity, hence turbulent mixing between mWDW and ISW.”*

### **Minor comments**

1. Some minor typographic errors are indicated in the annotated document.

We thank the reviewer for the detailed reading and the long list of suggestions, which have almost all been accepted. This greatly improves the quality of the manuscript. We are very grateful for the effort of the reviewer for this.

2. Generally speaking, I prefer to explicitly be introduced to figures in narrative form, e.g. “To

investigate the ISW layer distribution and variability, Figure 7 shows the ISW thickness computed as discussed at the end of Section 2”, rather than implicitly through reference as a part of the ongoing discussion. This way, the reader is clear about what each figure is intended to show.

Noted.

3. “targeting the sources of modified Warm Deep Water (mWDW) inflow and Ice Shelf Water (ISW) circulation” is a little unclear; how about “at three locations of the eastern Weddell Sea continental shelf, targeting the inflowing modified Warm Deep Water (mWDW) as well as the outflowing Ice Shelf Water (ISW)”

Accepted.

4. line 5, would it not be better to describe this region simply as the continental shelf of the eastern Weddell Sea? I don’t find “ between the Brunt Ice Shelf and Filchner Ice Shelf” to be particularly helpful. The region is significant because is it the exchange region between the shelf and the deep flow of the continental slope, right?

Accepted.

5. line 10, use “via a small trough” here because the name “ Small Trough” has yet to be introduced.

Accepted.

6. line 24, “formation of *the* Antarctic Bottom Water”

Accepted.

7. line 64, “However, the region has been suggested to be prone to a potential self-reinforcing change in the ocean circulation that could abruptly shift its cavity regime, turning it from a cold and dense cavity into a warm cavity with important global consequences for deep water formation and sea level rise.” This is very interesting. I would propose the authors consider mentioning this fact much earlier, perhaps even in the abstract, and using it to underscore the importance and urgency of their study.

We are reluctant to place that part in the abstract because of the word limit constraint.

8. line 76 “a fixed point” should be “fixed points”

Accepted.

9. line 77, it is the not the water column that is vulnerable.

Accepted. “leaves *instruments* in the upper part of the water column vulnerable”

10. line 82, “employ” may be a better choice than “utilize”

Accepted.

11. line 84, What exactly is new is not clear from this sentence; it could be the use of these particular floats, or the use of any Lagrangian floats.

Accepted. “We present and use, for the first time in this region, observations from Lagrangian profiling floats.”

12. line 87, it is not clear whether you are referring to physical risk to the researchers or risk to the floats.

Accepted. “make float deployments very risky for the instruments”

13. line 95, “complement” should be “complementing”

Accepted.

14. line 100 and following, minute symbols are consistently lacking on positions, e.g. 30°4' W. However, since the rest of the paper uses decimal degrees rather than degrees and arc-minutes, perhaps that convention should be followed here as well.

Accepted.

15. line 106, "sampled a *total* of"

Accepted.

16. line 130, "*with* frequency increasing linearly"

Accepted.

17. line 131 and elsewhere, "emission" should be "transmission"

Accepted.

18. line 132, "between *the* transmitted and expected"

Accepted.

19. line 148, since the notation  $\Delta d$  is only use this single time, it's not necessary to introduce this notation.

Accepted.

20. line 172, I don't understand whether "with the lowermost measurement of  $\Theta < -1.9^\circ\text{C}$  at  $< 50$  dbar from the bottom" is describing the observed distribution of ISW or a condition applied to observations in other that they be used for the ISW thickness computation.

We added "i.e." which should clarify: "*We only include layers that are located in the bottom layer (i.e. with the lowermost measurement of  $\Theta < -1.9^\circ\text{C}$  at  $< 50$  dbar from the bottom)*"

21. line 175, "for a time period of three months to four years" would be better.

Accepted.

22. line 180 "acoustic refraction" would help

Accepted.

23. line 183, "under the ice shelf cavity" should either be "under the ice shelf" or "within the cavity under the ice shelf."

Accepted. Changed to "*under the ice shelf*"

24. line 228, please say roughly how many kilometers father south.

Accepted.

25. line 228, what about the word "entrances" rather than "pathways"?

We prefer sticking with the word pathway, but if the reviewer has a very strong opinion about it, we are open to reconsider.

26. line 232, "latitude) to reach" would be better.

Accepted.

27. line 232, it is not the flow that is supported. What about, "the notion that the Small Through provides a conduit for mWDW from the continental slope to the Filcher Trough is further supported..."

Accepted.

28. line 237, "neither of these two floats"

Accepted.

29. line 243, “the floats’ abrupt turn”... “eddy motion”, because you are describing the character of the flow and not necessarily talking about eddy structures.

Accepted.

30. line 246, I am not sure what “mixing suggested by the float-derived hydrography” means; I do not believe this has previously been discussed. It would be sufficient to say “associated with instabilities and the resulting mixing of water masses”.

Accepted.

31. line 253, Regarding “Another mesoscale eddy is visible over the Filchner Trough sill in the trajectory of float P12679 that escapes the trough westwards”, please point to the figure(s) where we can see this.

Accepted.

32. line 255, “This bathymetric feature might, as is typical of topographically induced curvature in flow, enhance eddy development, and impact ISW overflow and its interaction with the off-shelf WDW.” This is pretty speculative; I would recommend moving it from Results to Discussion.

This part of the text has been removed from the revised manuscript.

33. line 260 or thereabouts, you might refer back to the end of Section 2 where you discuss estimating ISW thickness; by the time I got here, I had forgotten how you calculated it.

Accepted.

34. line 271, why is it relevant to compare the advective and seasonal timescales?

Agreed that is not so relevant and might be confusing. We removed the end of the sentence comparing with seasonal timescale.

35. line 282, it has been quite some pages since we last heard about HSSW; as this acronym is infrequently used, it would be clearer to write it out.

Accepted.

36. line 283, “neither of the two floats”

Accepted.

37. line 285, “that” should be “which” here.

Accepted.

38. line 303, “This alternative passage onto the continental shelf was previously hypothesised but never demonstrated as a possible gateway for mWDW”, we should be informed of this much earlier, starting with the abstract.

Accepted. See our response to the reviewer’s comment point “1 — Clarifying the novel results”, above.

39. line 304, see the second comment for line 232. I would start this off with something like “Other evidence supporting this notion of an inflow pathway through the Small Trough may be found in the literature.”

Accepted. Line 308: “Other evidence supporting this notion of an inflow pathway through the Small Trough is provided by current and temperature measurements taken over one year by the mooring P5 located in the Small Trough.”

40. line 321 “is of particular importance for the impact of warm water on the shelf” is a bit strong; how about “may be”?

Accepted.

41. line 345, for a paper of this length, I would recommend combining the conclusions and discussion into a single section.

We prefer keeping two separate sections unless the reviewer thinks this is a major point that needs to be addressed.

42. Latitude and longitude should be indicated as such in the table.

Accepted.

43. In Fig. 1 and Fig. 3 it would be good to present an approximate distance scale. The map projection being used should also be noted.

Accepted. The approximate distance per longitude in this area in the legend of Figure 1, as well as information about the projection. "The Lambert projection is used. In this area, 1° longitude corresponds to about 30~km." Since we use the same projection in Figure 3, we do not repeat this information.

44. Deployment locations should be marked in Fig. 3 so we know from this figure which way things are moving.

We marked the deployment locations in Fig. 3, as suggested.

45. Same for the map insets in Fig. 4.

We marked the deployment locations in Fig. 4, as suggested.

46. The meaning of the triangles in Fig. 4 is not clear to me from reading the caption. If the triangles are the same as the circles, the same symbol should be used.

We changed the colored circles on the map to triangles to be consistent with the triangles in the left panels.

47. Labelling the major water masses in Fig. 4 would be extremely helpful.

In the time-depth plots, we added the 27.75 isopycnal. They now contain the contour of the ISW and mWDW, which are the water masses discussed in this paper.

48. In Fig. 6, are the black symbols near the 74° S text meaning -2.2deg C? It seems very strange that the temperature should abruptly jump from -1.2deg C to -2.2deg C and back, as the colorbar would indicate. Or are these points actually off the color scale on the high end?

The black symbols were not associated to the colormap, but referred to the absence of the water mass. We removed those symbols in the new version of the figure to avoid confusion with the colorbar.

49. Again, if the red triangle and red circle are the same, the same symbol should be used.

We changed the colored circles on the map to triangles to be consistent with the triangles in the left panels.
